# Supplementary material for: Delineation of the movement disorders associated with FOXG1 mutations
Source: PubMed Central journal article supplement (PMC4862244; doi:10.1212/wnl.0000000000002585), 2016-05-10
Supplement: supp_WNL.0000000000002585_Tables.pdf [file supp_WNL.0000000000002585_Tables.pdf]

| Patient ID  | FOXG1 mutation                               | Effect on protein  | Mutation type | De novo                        | Previously reported | Reference of previous mutation report |
|-------------|----------------------------------------------|--------------------|---------------|--------------------------------|---------------------|---------------------------------------|
| DBL01-01    | c.735delC                                    | p.Tyr246Thrfs*80   | Frameshift    | Y                              | Y                   | Seltzer et al 2014 <sup>B</sup>       |
| DBL01-02    | 5.4kb deletion at Chr. 14q12 including FOXG1 |                    | Deletion      | Y                              | N/A                 | -                                     |
| DBL01-03    | c.981C>A                                     | p.Tyr327*          | Nonsense      | Y                              | N                   | -                                     |
| DBL01-04    | c.1186C>A                                    | p.Cys396*          | Nonsense      | Y                              | N                   | -                                     |
| DBL01-05    | c.460dupG                                    | p.Glu154Glyfs*301  | Frameshift    | Y                              | Y                   | Kortum et al. 2011 <sup>7</sup>       |
| DBL01-06    | 2kb deletion at Chr. 14q12, including FOXG1  |                    | Deletion      | Y                              | N/A                 | -                                     |
| DBL01-07    | c.460dupG                                    | p.Glu154Glyfs*301  | Frameshift    | Y                              | Y                   | Kortum et al. 2011 <sup>7</sup>       |
| DBL01-08    | c.946del                                     | p.Leu316Cysfs*10   | Frameshift    | Y                              | N                   | -                                     |
| DBL01-09    | c.695A>G                                     | p.Asn232Ser        | Missense      | Y                              | N                   | -                                     |
| DBL01-010a1 | c.572T>G                                     | p.Met191Arg        | Missense      | N (maternal somatic mosaicism) | N                   | -                                     |
| DBL01-010a2 | c.572T>G                                     | p.Met191Arg        | Missense      | N (maternal somatic mosaicism) | N                   | -                                     |
| DBL01-010a3 | c.572T>G                                     | p.Met191Arg        | Missense      | N (maternal somatic mosaicism) | N                   | -                                     |
| DB12-001    | c.651C>G                                     | p.Y217*            | Nonsense      | Y                              | Y                   | Seltzer et al, 2014 <sup>B</sup>      |
| DB12-002    | Clinical report did not include              | p.Gln86*           | Nonsense      | Y                              | Y                   | Seltzer et al, 2014 <sup>B</sup>      |
| DB12-003    | 6 Mb del                                     |                    | Deletion      | Y                              | Y                   | Seltzer et al, 2014 <sup>B</sup>      |
| DB12-004    | 1.1 Mb del                                   |                    | Deletion      | Y                              | Y                   | Seltzer et al, 2014 <sup>B</sup>      |
| DB12-006    | c.460dupG                                    | p.Glu154Glyfs*301  | Frameshift    | Y                              | Y                   | Seltzer et al, 2014 <sup>B</sup>      |
| DB12-008    | 0.25 Mb del                                  |                    | Deletion      | Y                              | Y                   | Seltzer et al, 2014 <sup>B</sup>      |
| DB12-016    | c.577G>A                                     | p.Ala193Thr        | Missense      | Y                              | Y                   | Seltzer et al, 2014 <sup>B</sup>      |
| DB12-017a1  | c.515_577del63                               | p.Gly172_Met192del | Deletion      | Likely parental gonadal mosaic | Y                   | Seltzer et al, 2014 <sup>B</sup>      |
| DB12-017a2  | c.515_577del63                               | p.Gly172_Met192del | Deletion      | Likely parental gonadal mosaic | Y                   | Seltzer et al, 2014 <sup>B</sup>      |
| DB13-007    | c.586C>T                                     | p.Gln196*          | Nonsense      | Y                              | Y                   | Seltzer et al, 2014 <sup>B</sup>      |
| DB13-029a1  | c.460dupG                                    | p.Glu154Glyfs*301  | Frameshift    | Likely parental gonadal mosaic | Y                   | Seltzer et al, 2014 <sup>B</sup>      |
| DB13-029a2  | c.460dupG                                    | p.Glu154Glyfs*301  | Frameshift    | Likely parental gonadal mosaic | Y                   | Seltzer et al, 2014 <sup>B</sup>      |
| DB13-041    | c.222_223dupGC                               | p.Pro75Argfs*118   | Frameshift    | Y                              | Y                   | Seltzer et al, 2014 <sup>B</sup>      |
| DB13-052a1  | c.460dupG                                    | p.Glu154Glyfs*301  | Frameshift    | Y                              | Y                   | Seltzer et al, 2014 <sup>B</sup>      |
| DB13-052a2  | c.460dupG                                    | p.Glu154Glyfs*301  | Frameshift    | Y                              | Y                   | Seltzer et al, 2014 <sup>B</sup>      |
| DB14-031    | c.263_278del16                               |                    | Frameshift    | Y                              | N                   | -                                     |

Table e-1. Genotype of patients with FOXG1 mutations.

| Patient ID  | OFC                    | Independent ambulation | Spoken language | Epilepsy                     | MRI findings                                                      | CSF Neurotransmitters  |
|-------------|------------------------|------------------------|-----------------|------------------------------|-------------------------------------------------------------------|------------------------|
| DBL01-01    | < -3 SD                | N                      | N               | Y (GTCS, Focal)              | ADCC, FTU, DM                                                     | Normal                 |
| DBL01-02    | < -3 SD                | N                      | N               | Y (IS, GTCS)                 | ADCC, FTU, CH, DM                                                 | Normal                 |
| DBL01-03    | < -3 SD                | N                      | N               | Y (GTCS)                     | ADCC, FTU, DM                                                     | Normal                 |
| DBL01-04    | -3 SD to -2SD          | N                      | N               | N                            | ADCC, FTU, DM                                                     | Normal                 |
| DBL01-05    | -3 SD                  | N                      | N               | N                            | ACC, DM                                                           | Normal                 |
| DBL01-06    | < -3 SD                | N                      | N               | Y                            | ADCC, FTU, CH, DM                                                 | Normal                 |
| DBL01-07    | < -3 SD                | N                      | N               | Y                            | ADCC, FTU, CH, DM                                                 | Normal                 |
| DBL01-08    | -3 SD                  | N                      | N               | Y                            | ADCC, FTU, DM                                                     | Low HVA, low bioplerin |
| DBL01-09    | - 1.33 SD              | Y                      | Y               | N (FC)                       | ADCC, FU, CH, DM                                                  | Low HVA and 5-HIAA     |
| DBL01-010a1 | 0 SD                   | Y                      | Y               | Y (Absence, GTCS)            | Posteriorly deficient CC (parietal underdevelopment), CH, NM      | Normal                 |
| DBL01-010a2 | + 0.67 SD-<br>+1.33 SD | Y                      | Y               | N (FC)                       | Normal CC , Normal cerebellum, NM                                 | Normal                 |
| DBL01-010a3 | +1.33 SD-<br>+2 SD     | Y                      | Y               | Y (tonic, absences, focal)   | Posteriorly deficient CC (parietal underdevelopment), mild CH, NM | Normal                 |
| DB12-001    | No info                | N                      | N               | Y (Tonic, myoclonic)         | No MRI                                                            | Not done               |
| DB12-002    | -5 SD                  | N                      | N               | Y (GTCS)                     | CC hypoplasia; FU; CH, MNA                                        | Not done               |
| DB12-003    | +MIC                   | N                      | N               | N                            | ACC, FU, MNA                                                      | Not done               |
| DB12-004    | -4 SD                  | N                      | N               | Y (Complex partial)          | ADCC, MNA                                                         | Not done               |
| DB12-006    | -4 SD                  | N                      | N               | Y (tonic, GTCS)              | No MRI                                                            | Not done               |
| DB12-008    | +MIC                   | N                      | N               | Y (tonic)                    | CC hypoplasia, FU, MNA                                            | Not done               |
| DB12-016    | +MIC                   | N                      | N               | Y (Tonic)                    | ADCC, MNA                                                         | Not done               |
| DB12-017a1  | -4 SD                  | N                      | N               | Y (Complex Partial)          | CH, FU, MNA                                                       | Not done               |
| DB12-017a2  | -4 SD                  | N                      | N               | N                            | CH, FU, MNA                                                       | Not done               |
| DB13-007    | -5 SD                  | N                      | N               | Y (Myoclonic)                | CC hypoplasia, FU, MNA                                            | Not done               |
| DB13-029a1  | +MIC                   | N                      | N               | Y (GTCS, Status Epilepticus) | No MRI                                                            | Not done               |
| DB13-029a2  | +MIC                   | N                      | N               | Y (GTCS)                     | No MRI                                                            | Not done               |
| DB13-041    | -4 SD                  | N                      | N               | Y (Tonic)                    | No MRI                                                            | Not done               |
| DB13-052a1  | -4 SD                  | N                      | Y               | Y (Complex Partial)          | No MRI                                                            | Not done               |
| DB13-052a2  | -4 SD                  | N                      | Y               | Y (Complex Partial)          | No MRI                                                            | Not done               |
| DB14-031    | -5 SD                  | N                      | N               | Y (Tonic)                    | ADCC, FU, MNA                                                     | Not done               |

**Table e-2. Clinical and neuroradiological findings in patients with *FOXP1* mutations.** Abbreviations: 5-HIAA: 5-hydroxyindolacetic acid, ACC: agenesis corpus callosum, ADCC: anteriorly deficient corpus callosum, CC: corpus callosum, CH: cerebellar hypoplasia, CSF: cerebrospinal fluid, DM: delayed myelination, FC: febrile convulsions, FU: frontal underdevelopment, FTU: frontotemporal underdevelopment), GTCS: generalised tonic clonic seizures, IS: infantile spasms, +MIC: microcephaly present but actual head circumference not available, MNA: myelination not assessed, MRI: magnetic resonance imaging, N= No, NM: normal myelin, OFC: occipitofrontal circumference, SD= standard deviation, Y= Yes

| Patient ID | Involuntary Movements | Age of Onset | Body Region Involved     | Functional Interference                                                         | Clinical course | Hospitalisation due to movements |
|------------|-----------------------|--------------|--------------------------|---------------------------------------------------------------------------------|-----------------|----------------------------------|
| DB12-001   | Yes                   | Birth        | Generalised              | Toileting, dressing, sleep, eating, other (bath)                                | 3               | No                               |
| DB12-002   | Yes                   | Birth        | Generalised, face        | Dressing, sleep, eating, other (play, learning, communication with device)      | 3               | No                               |
| DB12-003   | Yes                   | <12 months   | Mouth/tongue, arms/hands | Dressing, eating, other (non-verbal communication)                              | 3               | No                               |
| DB12-004   | Yes                   | 4 months     | Generalised, face        | Toileting, dressing, sleep, eating, speaking, other (walking)                   | 4               | No                               |
| DB12-006   | Yes                   | <12 months   | Generalised, trunk       | Sleep, eating, other (sitting)                                                  | 5               | No                               |
| DB12-008   | Yes                   | 10 months    | Generalised, trunk       | Toileting, dressing, eating, other (play, communication with device)            | 3               | No                               |
| DB12-016   | Yes                   | 12 months    | Arms/hand, legs/feet     | eating                                                                          | 4               | No                               |
| DB12-017a1 | Yes                   | 3-5 months   | Generalised              | Toileting, dressing, sleep, eating, speaking, other (fine motor tasks, walking) | 2               | No                               |
| DB12-017a2 | Yes                   | 12 months    | Generalised, trunk       | Dressing, sleep, eating, speaking, other (fine motor tasks)                     | 4               | No                               |
| DB13-007   | Yes                   | 9 months     | Generalised, face, trunk | Toileting, dressing, sleep, eating                                              | 4               | No                               |
| DB13-029a1 | Yes                   | 6 months     | Arms/hands, legs/ feet   | Toileting, dressing, sleep, eating                                              | 3               | No                               |
| DB13-029a2 | Yes                   | 3 months     | Arms/hands, legs/feet    | Dressing, sleep                                                                 | 3               | No                               |
| DB13-041   | Yes                   | Birth        | Generalised              | Toileting, dressing, eating, other (sitting, walking, standing)                 | 3               | No                               |
| DB13-052a1 | Yes                   | 12 months    | Generalised, trunk       | Dressing, eating, speaking, other (pushing up, walking)                         | 5               | No                               |
| DB13-052a2 | Yes                   | 12 months    | Generalised, trunk       | Dressing, eating, speaking, other (pushing up, walking)                         | 5               | No                               |
| DB14-031   | Yes                   | Unknown      | Generalised, trunk       | Dressing, eating, speaking, other (pushing up, walking)                         | 3               | No                               |

**Table e-3. Parental perception on the impact of movement disorders on everyday activities, response to therapeutic interventions and evolution over time.** Key: 1= much improved, 2= improved, 3= stable, 4= worsened, 5= much worse. When describing involuntary movements, the term 'generalised' indicates involvement of the mouth/tongue, head/neck, arms/hands and legs/feet.
